# Supplementary material
Source: publisher figshare collection journal article supplement (https://acs.figshare.com/ndownloader/files/18678941)
Supplement: Supplementary file 1 [file 18678941]

Archive with 3 entries (3 files):
- info.xml
- jz9b02972_high_quality.mp4
- jz9b02972.pdf
