# Supplementary material
Source: publisher figshare collection journal article supplement (https://acs.figshare.com/ndownloader/files/18678941)
Supplement: Supplementary file 1 [file 18678941 › info.xml]

<presentation>
	<article>
		<title>Reversing Organic-inorganic Hybrid Perovskite Degradation in Water via pH and Hydrogen Bonds</title>
		<doi>10.1021/acs.jpclett.9b02972</doi>
		<copyright>American Chemical Society</copyright>
		<narrator>Ryan Taoran Wang</narrator>
		<contact>Ryan Taoran Wang</contact>
		<contact-email>wangtaoranuk@hotmail.com</contact-email>
		<author-list>
			<author>Gu Xu</author>
		</author-list>
	</article>
	<slides height-width-ratio=".75">
		<slide audio-time="10">
			<subtitle/>
		</slide>
		<slide audio-time="28">
			<subtitle/>
		</slide>
		<slide audio-time="72">
			<subtitle/>
		</slide>
		<slide audio-time="35">
			<subtitle/>
		</slide>
		<slide audio-time="37">
			<subtitle/>
		</slide>
		<slide audio-time="34">
			<subtitle/>
		</slide>
		<slide audio-time="58">
			<subtitle/>
		</slide>
	</slides>
	<audio duration="274"/>
</presentation>
